# Supplementary material
Source: publisher figshare collection journal article supplement (https://gsajournals.figshare.com/ndownloader/files/18002162)
Supplement: Supplementary file 1 [file 18002162]

pXF89: (Cassette 2) GCTCTTCGATG\_Halotag\_GGAAGCGGC GGTCGAAGAGC  
SapI M G S G G SapI

pXF88: (cassette 3) GCTCTTCGGGTGGAAGCGGC\_Halotag\_TAACGAAGAGC  
SapI G G S G \* SapI

pSDH51: (cassette 3a) GCTCTTCGGGTGGAAGCGGC\_Halotag\_ACGCGAAGAGC  
SapI G G S G T SapI

**Figure S1.** Sequence of HaloTag donor cassettes. Cassette-specific flanking sequences are shown at the top. The SapI recognition sites are in blue and the cleavages sites are in red.

ceGFP with PATC introns

pJF5: (cassette 2) **GCTCTTCGATG**\_ceGFP\_**GGAAGCGCGGT****CGAAGAGC**  
**SapI** **M** **G S G G** **SapI**

pJF6: (cassette 3) **GCTCTTCGGT****GGAAGCGGC**\_ceGFP\_**TAACGAAGAGC**  
**SapI** **G G S G** **\*** **SapI**

TCCAAGgtaacacttagtttttgttgctctgttataaaattaat  
S K  
tttaagGGAGAGGAGCTGTTACCCGGAGTCGTCCCAATCCTCGTCGAGCTCGACGGGGACGTCA  
G E E L F T G V V P I L V E L D G D V  
ACGGACACAAGTTCTCCGTGTCCGGAGGGAGAGGGAGATGCCACCTACGGAAAAGCTCACCCT  
N G H K F S V S G E G E G D A T Y G K L T L  
CAAGTTTCATCTGCACCACCGGAAAAGCTCCAGTCCCATGGCCAACCCTCGTCAACACCTTCTGC  
K F I C T T G K L P V P W P T L V T T F C  
TACGGAGTCCAATGCTTCTCCCGTTACCCAGgtaagttttctgtttatttacttgtttctgag  
Y G V Q C F S R Y P  
Aattgggatttttagctgaaaaattggattttaagatgaaaaattgaaattttcaactaaaaat  
ttcaatttttttagctgaaaaagttaaatttttagctaaagagtgggatttttagttgaaaaatcga  
gattttctagctaaaaagtatgatttttagctgaaagattggaattttaagcagaaaaaattgta  
tttttagctgataaatcaaattttaagcggaaaaatttgaatttttagctaaaaaatccattt  
tcaactaaaaatcgtgatttttagctttaaaaattggatttttagctgaaaaatcggattttta  
gctgaaaaattgaaatttttagttaaaaaagttagatttttaacagaaaaagttagatttttagt  
taaaaaataatatttttagctaaaaatacaattttcaactaaagatcgtgatttttagcttta  
aaaattggatttttagctaaaaaatcggatttttagctgaaaaattgaaatttttttagttaaaaa  
gtgggatttttaagatgaaaaagttagatttttagctgaaaaagttagatttttagctaaaaata  
caattttcaactgaaaaattgggatttttagctttaaaaattggatttttagcttttaaaaaattg  
gttttttagctgaaaaagttagatttttagttgaaaaattgaaattgttttagctgaaaaattggaa  
tttttaagtaaaaaattgggatttttaagatgaaaaagttagatttttagctgaaaaagttagat  
tttttagctaaaaatacaattttcaactgaaaaattgggatttttagctcaaaagtgggacgaa  
agacgaaaaaaaatcgtatttttaccaaaaatttagatttttagACCCATGAAGCGTCACGA  
D H M K R H D  
CTTCTTCAAGTCCGCCATGCCAGAGGGATACGTCCAAGAGCGTACCATCTTCTCAAGGACGAC  
F F K S A M P E G Y V Q E R T I F F K D D  
GGAAACTACAAGgtaagttatgtacgcgattttctcggcgaaaaaatggacttttttgcgtcaaaa  
G N Y K  
Actgaatttttagctgttttttgcactgaaaaatgctgaaaaattggttttttgctgaaaaattca  
cggaaaaaagctgaaaaatattgcagaaatcgacgaaaaatgccttttttgcgtgaaatttcagcc  
agaaaaattgttcagaaatcgcaattttctgcgcaaaatcgacgttttttcggcgaaaaattggtagat  
tttgaaacgcaaaattgtgaaaaatggacttttttgcgtcaaaaacagactttttgagcttttttc  
acactgaaaaatgggtgaaaaattggatttttccagcagaaaaattcggaatttttcaatttttggcg  
gaaatttgacgaaaaatatgaaaaacaccgattttttgtctgaaaaagtcaaaagccgaaaaa  
attggcccaaaaatctccaaaaatcggaacttttttgcgttttttgcgtgaaaaattgaaatttttt  
tgaaaaaattgagcaaaaatcgccgaaaaacccgctaaaaaaaactgcccgaatttggcaattttgag  
cttaaaaaaacttgaaaaatgctcaaaaattacccaattttcacccggaatttgagctaaaaatcgt  
cgaaaaagactgaattttcaatttttagctgaaaaatctgcctattttcggctaaaaattgcttta  
aaaacatttaaaattcaatttttttgctaaaaataactcagattgacctttttttctccaaaaa  
tgacaaaaaaaatcaatcagaaaaatcgcatttttttacaaaaattggcttcaaaacgtct  
aaatttctccctaatttttgcgtgctgaaaaattgtgcaaaaatcacccgaaaaatgacgatttttagg  
ctgaaaaatctcaaaaaaagctcaaaattcccaacttttcaccgcaaaaagacgaaaaaagctc  
caaatttatcgatttaacattttcagACCCGTGCCGAGGTCAAGTTCGAGGGAGACCCCTCGTC  
T R A E V K F E G D T L V  
AACCGTATCGAGCTCAAGGAATCGACTTCAAGGAGGACGGTAACATCCTGGGACACAAAGCTGG  
N R I E L K G I D F K E D G N I L G H K L  
AGTACAACTACAACCTCCACAACGTCTACATCATGGCCGACAAGCAAAAGAACGGAATCAAGGT  
E Y N Y N S H N V Y I M A D K Q K N G I K V  
CAACTTCAAGgtaagttcttttttttgcgtgatttttgagtgaaaaattgatggaattcacaaaa  
N F K  
aatggccaaagaatcctcaaaattggccgaaaaattctgaaaaatgacctaaaaatcacccgaaaa  
acggcaaaaaattatctgaaaaatcgccgaaaaatctcaaattttgaggaaattcccgctaaaaaat  
taataaaaaatcacccgaaaaaaggccaaaaattacctaataaaggccgaaaaatcgctaaaaagg  
ccaaaaattctgaaaaatggccaaatttcaattttttcacacacaaaaaatccctgaattttctta  
tttttactcgaaaaactgtggattttacgggggtaaaaattcagtttttagtgctattttcacaa  
gaaaaacacagcattttcgacaaaaaactccgatttttaagccaaaaatttgaggttttttagtttt  
ttacgtgaaaacctgaacttttttgcaaaaaaacacttttttttagactaaaaatcaatttttcg  
atcaaaaaatcactaatttttgctgaaaaaatatagatttttccactttttcactgaaaaaaaac  
tgatttttactagaaaaatcaagttgttttttagaccaaaaattttatttttccgctgaaaaatta  
tcgttttttagtcaatttttagctaaaaatccctgaaattctggatttttagcgaaaaaaactcg  
aaatttttcaaaaaaaccccggttttaaaaatgagtttagactgaaaattccgattttttgagccaa  
aaatttgatttttaactgaaaaaaaattggatttttaacccaaaaaatcagtttttcagtgatttt  
tagagtaaaaaatcactgatttttaacacaaaattccagtttttgcgtgatttttcaactagaaaaatc  
ccgattttttcccaaaaaaatccattttttccgactaaaaatcccaagtaattttcagATCCGT  
I R  
CACAACTATCGAGGACGGATCGGTCCAATCGCGGACCCTACCAACAAAAACCCCCAATCGGTG  
H N I E D G S V Q L A D H Y Q Q N T P I G  
ACGGACAGTCTCTCCAGACAACCACTACCTCTCCACCCAATCGGCCTCTCCAAGGACCC  
D G P V L L P D N H Y L S T Q S A L S K D P  
AAACGAGAAGCGTGACCATGCTCTCTCGAGTTCGTACCGCCGCGGAATCACCACGGA  
N E K R D H M V L L E F V T A A G I T H G  
ATGGACGAGCTCTACAAG  
M D E L Y K

**Figure S2.** Sequence of ceGFP donor cassettes. Cassette-specific flanking sequences are shown at the top. The SapI recognition sites are in blue and the cleavages sites are in red.

pXF222 (Cassette 2) GCTCTTCGATG\_mKate2\_GGAGGTGGAGGTGGTCGAAGAGC  
SapI M G G G G G SapI

pXF130 (Cassette 3) GCTCTTCGGTGGAGGTGGAGGT\_mKate2\_TAACGAAGAGC  
SapI G G G G G \* SapI

pSM04 (Cassette 3a) GCTCTTCGGTGGAGGTGGAGGT\_mKate2\_AGCCGAAGAGC  
SapI G G G G G S SapI

pSM05 (Cassette 3b) GCTCTTCGAGCGGAGGTGGAGGT\_mKate2\_TAACGAAGAGC  
SapI S G G G G \* SapI

**Figure S3.** Sequence of mKate2 donor cassettes. Cassette-specific flanking sequences are shown at the top. The SapI recognition sites are in blue and the cleavages sites are in red.

mScarlet

pSM10 (Cassette 2) GCTCTTCGATG\_mKate2\_GGAGGTGGAGGTGGTCTCGAAGAGC  
SapI M G G G G G SapI

pSM08 (Cassette 3) GCTCTTCGGTGGAGGTGGAGGT\_mScarlet\_TAACGAAGAGC  
SapI G G G G G \* SapI

pSDH57 (Cassette3a)

GCTCTTCGGT\_mScarlet\_TTGGCTGAAGCGGCAGCTAAAGAAGCTGCCGCGAAGGAAGCAG  
SapI G L A E A A A K E A A A K E A  
CAGCCAAGGAGGCCGAGCGAAGGAAGCCGCTGCAAAAAGCCGCGGCCACGCGAAGAGC  
A A K E A A A K E A A A K A A A S SapI

GTCTCCAAGGGCGAGGCAGTCATCAAGGAGTTCATGCGTTT  
V S K G E A V I K E F M R F  
CAAGGTGCACATGGAGGGATCCATGAACGGACACGAGTTCGAGATCGAGGGCGAGGGAGAGGGA  
K V H M E G S M N G H E F E I E G E G E G  
CGCCCATACGAGGGAACCCAGACCGCCAAGCTCAAGGTGACCAAGgtaagtttaaacatatata  
R P Y E G T Q T A K L K V T K  
tactaactaaccctgattattttaaattttcagGGTGGACCACTGCCATTCTCTCTGGGACATCCTT  
G G P L P F S W D I L  
CTCCCCACAATTTCATGTACGGCTCCCGTGCCTTCACCAAGCACCCAGCCGACATCCCCGACTAC  
S P Q F M Y G S R A F T K H P A D I P D Y  
TACAAGCAATCCTTCCCCGAGGGATTCAGTGGGAGCGCGTGATGAACCTTCGAGGACGGAGGAG  
Y K Q S F P E G F K W E R V M N F E D G G  
CCGTGACCGTCACCCAAGACACCTCCCTGGAGGACGGAACCCATCATCTACAAGGTGAAGCTCCG  
A V T V T Q D T S L E D G T L I Y K V K L R  
TGGAACCAACTTCCACCTGACGGCCAGTCATGCAGAAGAAGACCATGGGATGGGAAGCCTCC  
G T N F P P D G P V M Q K K T M G W E A S  
ACCGAGCGTTTGTACCCAGAGGACGGAGTGCTCAAGgtaagtttaaacagttcgggtactaacta  
T E R L Y P E D G V L K  
accatacatattttaaattttcagGGAGACATTAAGATGGCCCTCCGTCTGAAGGACGGAGGACG  
G D I K M A L R L K D G G R  
TTACCTGGCGGACTTCAAGACCACCTACAAGGCCAAGAAGCCAGTCCAGATGCCAGGAGCCTAC  
Y L A D F K T T Y K A K K P V Q M P G A Y  
AACGTCGACCGCAAGCTCGACATCACCTCCCAACGAGGACTACACCGTCGTGGAGCAATACG  
N V D R K L D I T S H N E D Y T V V E Q Y  
AACGTTCCGAGGGACGCCACTCCACCGGAGGAATGGACGAGCTGTACAAG  
E R S E G R H S T G G M D E L Y K

**Figure S4.** Sequence of mScarlet donor cassettes. Cassette-specific flanking sequences are shown at the top. The SapI recognition sites are in blue and the cleavages sites are in red.

## Dendra2

pSM12 (Cassette 2) GCTCTTCGATG\_Dendra2\_GGAAGCGGCGGTCTGAAGAGC  
SapI M G S G G SapI

pSM03 (Cassette 3) GCTCTTCGGGTGGAAGCGGC\_Dendra2\_TAACGAAGAGC  
SapI G G S G \* SapI

```

AACCTTATTAAGGAAGATATGAGAGTCAAAGTGCATATGGAAGG
  N L I K E D M R V K V H M E G
AAACGTCAACGGTCATGCATTTGTTATTGAAGGTGAAGGTAAAGGAAAGCCATACGAAGGAAC
  N V N G H A F V I E G E G K G K P Y E G T
CAAACGTAACTTGACTGTCAAAGAAGGAGCACCCTACCATTAGTTACgtaagtttaaaca
  Q T A N L T V K E G A P L P F S Y
tataataactaactaaccctgattatttaaattttcagGATATTCTCACTACTGCCGTCCATTA
                                D I L T T A V H Y
CGGAAACAGAGTTTTTACTAAATACCCAGAAGATATTCCTGATTACTTCAAGCAATCGTTTCCA
  G N R V F T K Y P E D I P D Y F K Q S F P
GAAGGATACTCGTGGGAAAGAACTATGACTTTTGAAGATAAAGGTATTTGCACTATTgtaagtt
  E G Y S W E R T M T F E D K G I C T I
taaacagttcggtaactaactaaccatacatatttaaattttcagAGAAGTGATATTAGTCTCGA
                                R S D I S L E
AGGTGATTGCTTCTTCCAAAATGTCAGATTTAAAGGTACTAACTTTCCTCCTAACGGACCAGTT
  G D C F F Q N V R F K G T N F P P N G P V
ATGCAAAAGAAGACTCTTAAGTGGGAACCATCGACTGAAAACTACATGTTAGAGATGGACTAC
  M Q K K T L K W E P S T E K L H V R D G L
TTGTTGGAgttaagtttaaacttggacttactaactaacggattataatttaaattttcagAACAT
  L V G                                N I
TAACATGGCACTACTACTAGAAGGTGGAGGTCCTACTACCTTTGCGATTTTAAAACCACTTACAAA
  N M A L L L E G G G H Y L C D F K T T Y K
GCAAAGAAGGTCGTCCAACCTCCAGATGCACACTTTGTTGATCACAGAATTGAAATACTAGGAA
  A K K V V Q L P D A H F V D H R I E I L G
ACGATTCCGATTACAACAAAGTTAAGCTATACGAACACGCAGTTGCAAGATACAGTCCTCTACC
  N D S D Y N K V K L Y E H A V A R Y S P L P
AAGTCAAGTATGG
  S Q V W
```

**Figure S5.** Sequence of Dendra2 donor cassettes. Cassette-specific flanking sequences are shown at the top. The SapI recognition sites are in blue and the cleavages sites are in red.

# ePDZ

PSDH61 (Cassette 2) GCTCTTCGATG\_ePDZ\_GGAGCTGGTCAAGAGC  
SapI M G A G SapI

pSDH52 (Cassette 3b)

GCTCTTCGAGCGGAGGTTCCGGAGGATCTGGCGGATCT\_ePDZ\_TAACGAAGAGC  
SapI S G G S G G S G G S \* SapI

CCAGAGCTCGGATTCTCGATCTCCGGAGGTGTCGGAGGCCGTGGAAATCCATTCCGTCCTGACG  
P E L G F S I S G G V G G R G N P F R P D  
ATGATGGAATTTTGTACTCGGGTCCAACCAGAAGGACCAGCTAGCAAACTTCTTCAACCTGG  
D D G I F V T R V Q P E G P A S K L L Q P G  
AGACAAGgtaagttaattaatttcacgagagatcgtgcaattttctcattcatgaagacttttc  
D K  
agATCATCCAAGCCAACGGTTACTCTTTTCATTAATATTGAGCACGGTCAGGCTGTCAGCCTTCT  
I I Q A N G Y S F I N I E H G Q A V S L L  
CAAGACCTTCCAGAACACAGTCGAGCTCATCATCGTCCGAGAGGTAGGAAACGGAGCTAAGCAG  
K T F Q N T V E L I I V R E V G N G A K Q  
GAGATCCGTGTCCGCGTCGAAAAGGACGGAGGATCCGGAGgtaagttataattttctcctacaaa  
E I R V R V E K D G G S G  
tttaaaactgacttacttttttctaatttttcagGAGTTTCCAGTGTTCACCAACCTTGAGGT  
G V S S V P T N L E V  
CGTTGCTGCCACACCAACAAGCCTTCTCATCTCCTGGGATGCTTACCGTGAACCTTCCAGTCTCC  
V A A T P T S L L I S W D A Y R E L P V S  
TACTATAGGATCACCTACGGAGAGACCGGAGGAAATTCTCCAGTCCAAGAATTCACGGTCCCAG  
Y Y R I T Y G E T G G N S P V Q E F T V P  
gtaagttaattaatttttatgagaatctaaaagtaatttgagagtagacaatattttcagGAAGC  
G S  
AAGTCGACCGCCACAATTTCCGGATTGAAGCCAGGAGTCGACTACACCATCACTGTCTATGCTC  
K S T A T I S G L K P G V D Y T I T V Y A  
ATTACAATATCATTACTACTCATCACCAATCTCCATCAATTATAGAACGAGTAGATTGGAGCT  
H Y N Y H Y Y S S P I S I N Y R T S R L E L  
CAAGCTCCGTATTTTGCAATCGACAGTGCCACGCGCCCGTGATCCACCCGTCGCGACG  
K L R I L Q S T V P R A R D P P V A T

**Figure S6.** Sequence of ePDZ donor cassettes. Cassette-specific flanking sequences are shown at the top. The SapI recognition sites are in blue and the cleavages sites are in red.



LOV

pXF276 (Cassette 3b)    GCTCTTCGAGC\_LOV\_TAACGAAGAGC  
                             SapI       S       \*       SapI

```
CCTCGTCTTGCTGCTGCACTTGAGCGCATTGAGAAGAATTTTGTAATCACCGATCCCCGACTTC
P R L A A A L E R I E K N F V I T D P R L
CGGATAACCCAATCATTTTCGTTCTGATTCGTTCTTCAGCTCACCGAGTATTCACGTGAAGA
P D N P I I F A S D S F L Q L T E Y S R E E
GgtaagttttaattaattaagttccaaatcaagatacgttcttttcgccatacattttcagATCC
I
TTGGAAGAAATTGCCGATTCCTCCAGGGACCAGAACTGACAGAGCTACCGTCAGAAAGATCCG
L G R N C R F L Q G P E T D R A T V R K I R
TGACGCCATCGACAATCAGACTGAGGTTACCGTCCAGCTCATCAACTACACCAAGTCCGGAAAG
D A I D N Q T E V T V Q L I N Y T K S G K
gtaagttataattttcgcatttggttgatatcgatatcaatgtttaactgaatttttcagAAGTTCT
K F
GGAATCTTTTCCATCTTCAACCAATGCGTGATCAGAAGGGAGATGTTCAATACTTCATTGGAGT
W N L F H L Q P M R D Q K G D V Q Y F I G V
TCAACTCGATGGAACCGAACATGTTTCGTGACGCTGCCGAGCGTGAAGCTGTTATGCTCGCCAAG
Q L D G T E H V R D A A E R E A V M L A K
AAGACTGCTGAAGAAATTGATAAAGCCGTCGACACTTGGGTC
K T A E E I D K A V D T W V
```

**Figure S7.** Sequence of LOVdonor cassette. Flanking sequences are shown at the top. The SapI recognition sites are in blue and the cleavages sites are in red.
